# Supplementary material
Source: PubMed Central journal article supplement (PMC4706111)
Supplement: supp_ddv459_ddv459supp.pdf [file supp_ddv459_ddv459supp.pdf]

**Supplementary Material for:**

**CpG methylation differences between neurons and glia are highly conserved from mouse to human**

Noah J. Kessler<sup>1</sup>, Timothy Van Baak<sup>1</sup>, Maria Baker<sup>1</sup>, Eleonora Laritsky<sup>1</sup>, Cristian Coarfa<sup>2</sup>, Robert A. Waterland<sup>1,3,\*</sup>

<sup>1</sup>Department of Pediatrics, Baylor College of Medicine, USDA/ARS Children's Nutrition Research Center

<sup>2</sup>Department of Molecular & Cell Biology, Baylor College of Medicine

<sup>3</sup>Department of Molecular & Human Genetics, Baylor College of Medicine, USDA/ARS Children's Nutrition Research Center, 1100 Bates St., Ste. 5080, Houston, TX 77030, USA

**Contents**

**Link to UCSC Genome Browser** including our representation of Lister & Mukamel et al.'s Bisulfite-seq data on Neuron vs. Glia methylation differences in mouse cortex:

[http://genome.ucsc.edu/cgi-bin/hgTracks?hgS\\_doOtherUser=submit&hgS\\_otherUserName=noah.kessler&hgS\\_otherUserSessionName=Lister%2DMukamel%20mm9%20Pub](http://genome.ucsc.edu/cgi-bin/hgTracks?hgS_doOtherUser=submit&hgS_otherUserName=noah.kessler&hgS_otherUserSessionName=Lister%2DMukamel%20mm9%20Pub)

**Figure S1.** Examples of genomic regions showing neuron vs. glia methylation differences.

**Figure S2.** CpG density distributions among genes classified as differentially methylated either by Lister & Mukamel et al or by our analysis.

**Figure S3.** NeuN<sup>+</sup> and NeuN<sup>-</sup> nuclei were sorted well by fluorescence-activating sorting.

**Figure S4.** Size and CpG content of neuron vs. glia DMRs identified by the MOABS analysis.

**Figure S5.** Distribution of credible differences in proportional methylation [ $\text{abs}(\text{NeuN}^+ - \text{NeuN}^-)$ ] identified by the MOABS analysis.

**Figure S6.** Comparison of genes identified as showing neuron vs. glia differential methylation by MOABS vs. our analysis.

**Figure S7.** Comparison of genes identified as showing neuron vs. glia differences in methylation in human cortex by Guintivano et al. vs. in our analysis of the Lister & Mukamel et al human data.

**Figure S8.** Conservation of gene-specific neuron vs. glia methylation differences between mouse and human cortex is associated with sequence-level conservation

**Figure S9.** Pyrosequencing standards for each assay used for validation confirm the accuracy of the assays.

**(Supplementary Tables are included separately as an Excel file.)**



Figure S1 (cont.)

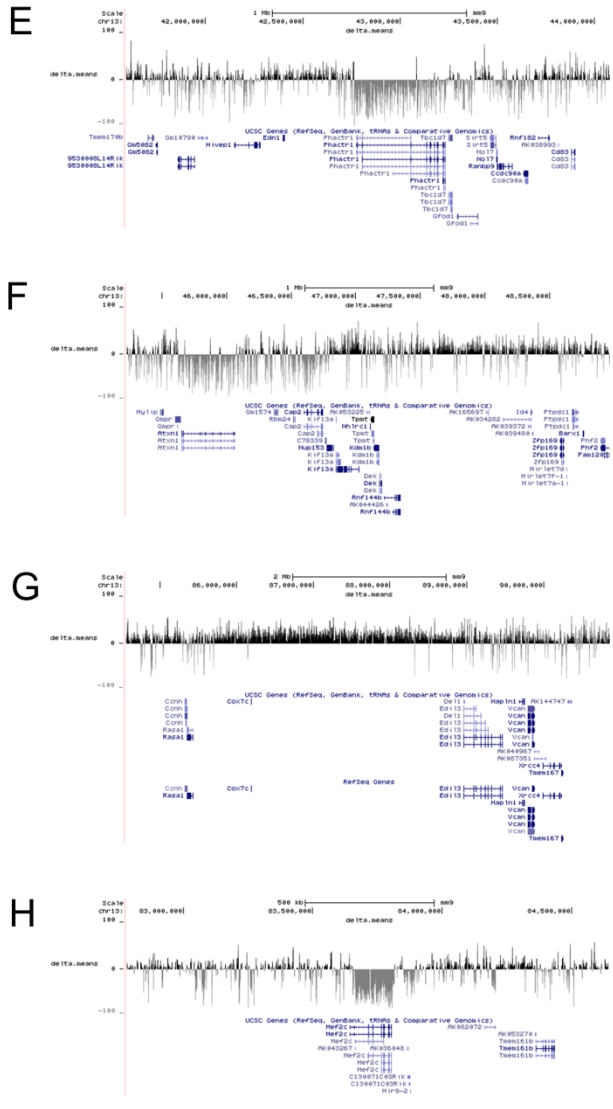



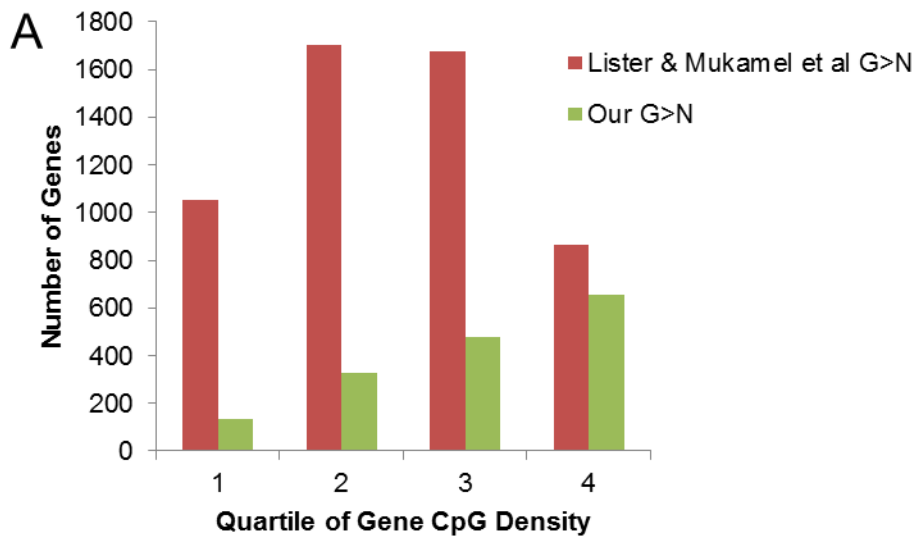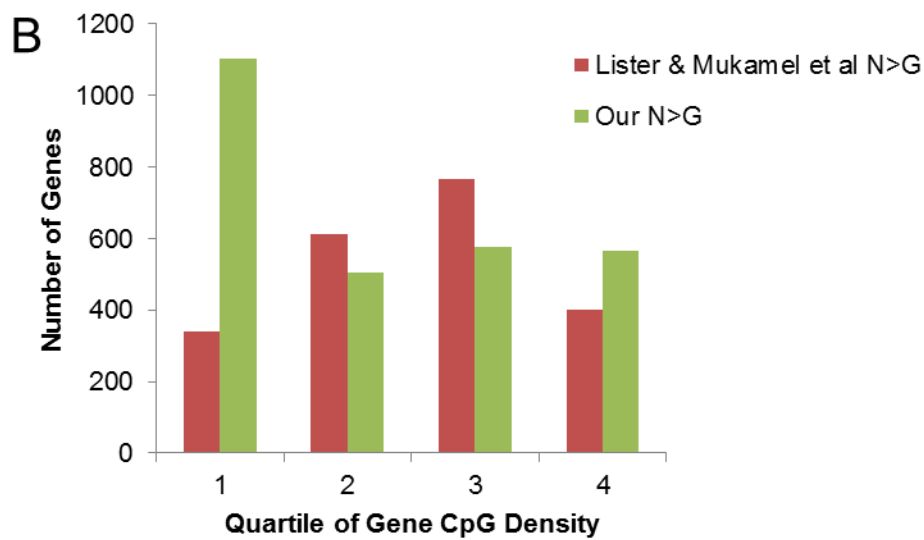

**Figure S2.** CpG density distributions among genes classified as differentially methylated either by Lister & Mukamel *et al.* or by our analysis. Among genes classified as either G>N (**A**) or N>G (**B**), the greatest discrepancies between the two analyses occur at genes with lower CpG density.

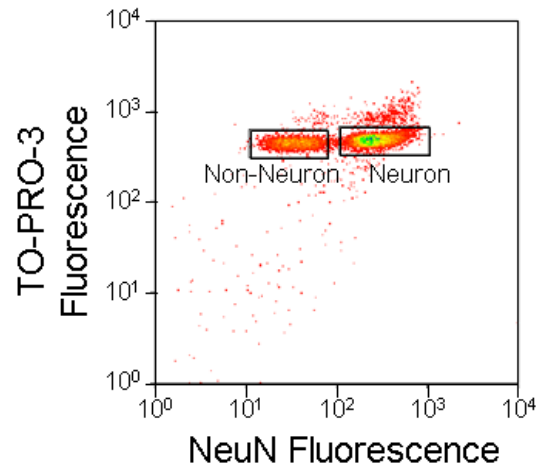

**Figure S3. NeuN<sup>+</sup> and NeuN<sup>-</sup> nuclei were sorted well by fluorescence-activated sorting.** The two rectangles represent the gates of NeuN and TO-PRO-3 levels used for sorting nuclei.

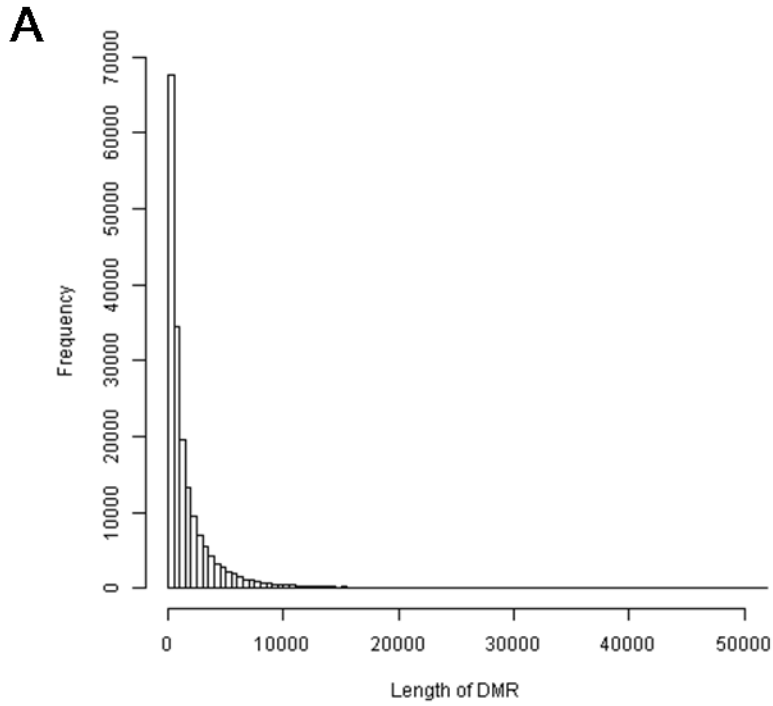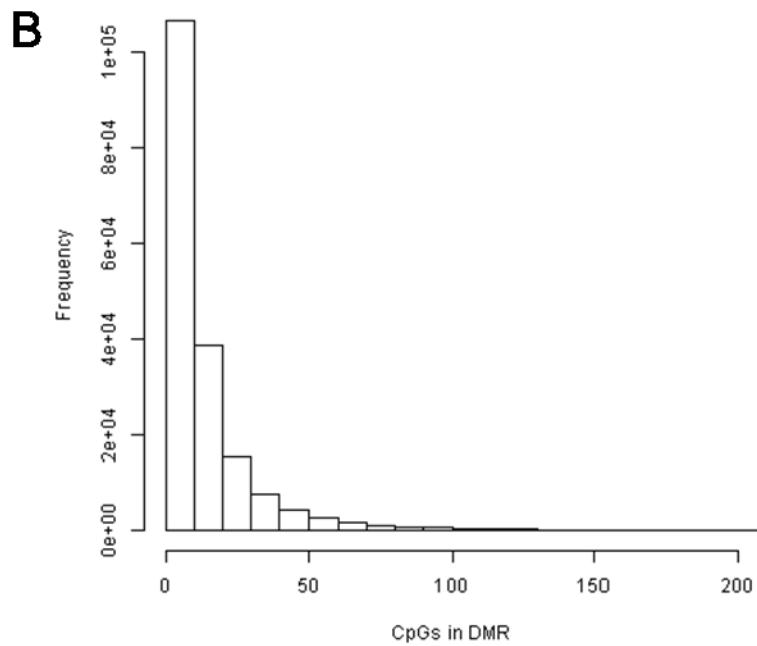

**Figure S4.** Size and CpG content of neuron vs. glia DMRs identified by the MOABS analysis. **(A)** Distribution of DMR size. Most DMRs are less than 20kb long. **(B)** Distribution of CpG content per DMR. Most DMRs encompass fewer than 150 CpG sites.

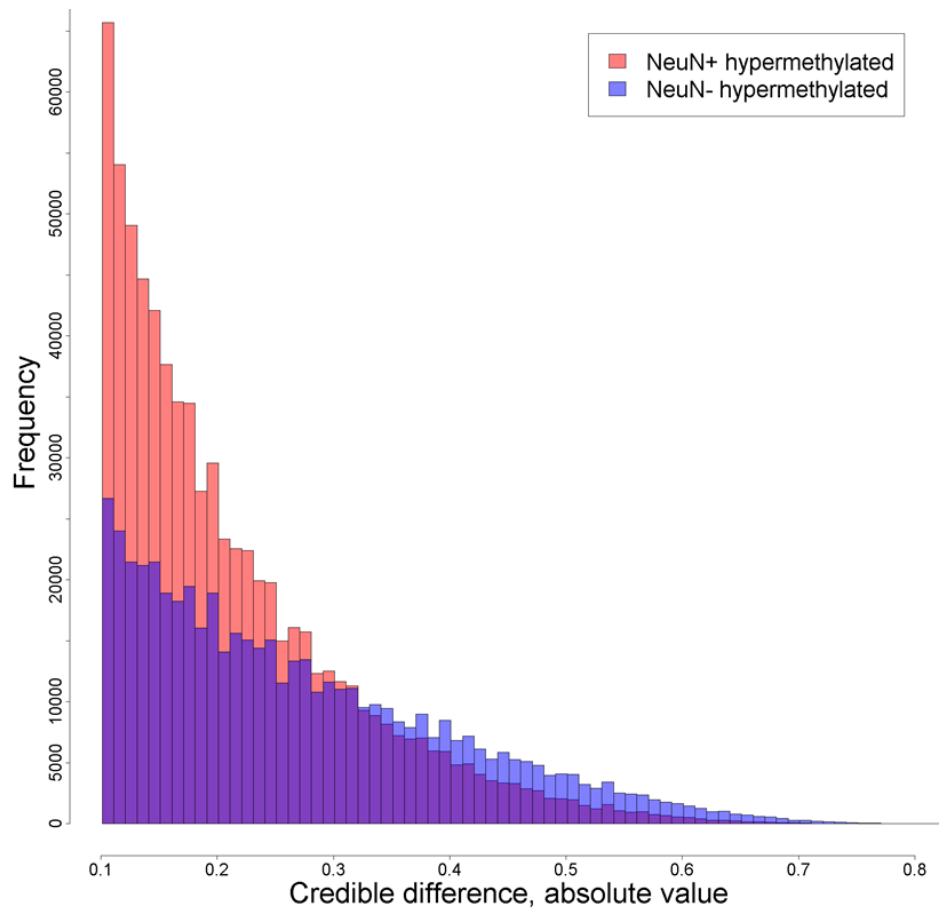

**Figure S5.** Distribution of credible differences in proportional methylation [ $\text{abs}(\text{NeuN}^+ - \text{NeuN}^-)$ ] identified by the MOABS analysis. Although more DMRs indicated relative hypermethylation in neurons relative to glia ( $\text{NeuN}^+$  hypermethylated, red) DMRs with relative hypermethylation in glia relative to neurons ( $\text{NeuN}^-$  hypermethylated, blue) tended to reflect greater cell-type differences in methylation.



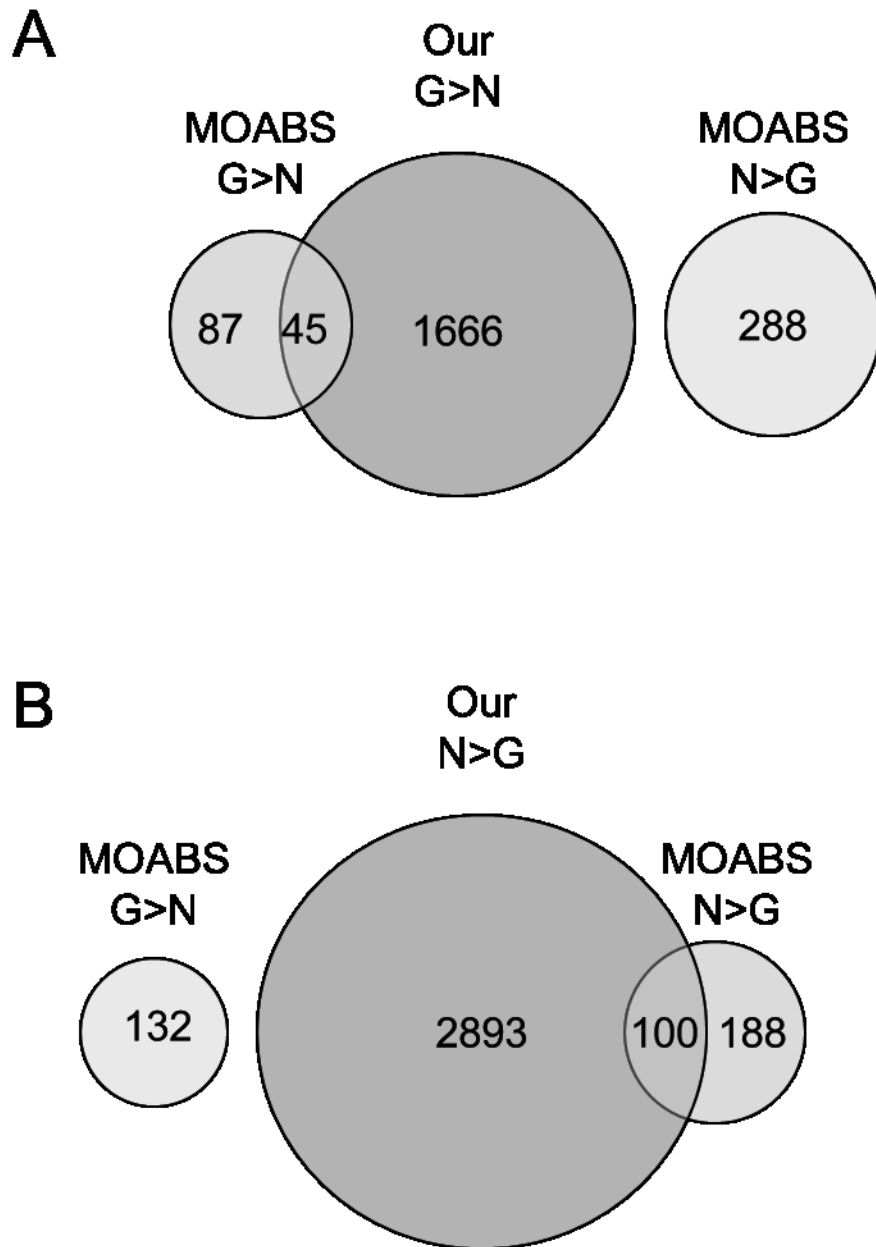

**Figure S6.** Comparison of genes identified as showing neuron vs. glia differential methylation by MOABS vs. our analysis. (A) Over 1/3 of the 132 genes identified as G>N by MOABS were likewise classified in our analysis. None of the 288 genes identified by MOABS as N>G were classified oppositely by our analysis. (B) Likewise, over 1/3 of the 288 genes identified as N>G by MOABS were likewise classified in our analysis. None of the 132 genes identified by MOABS as G>N were classified oppositely by our analysis.

**A**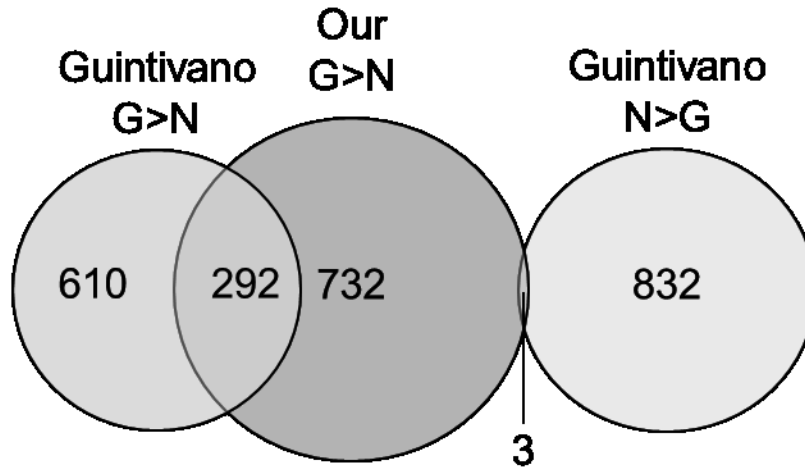**B**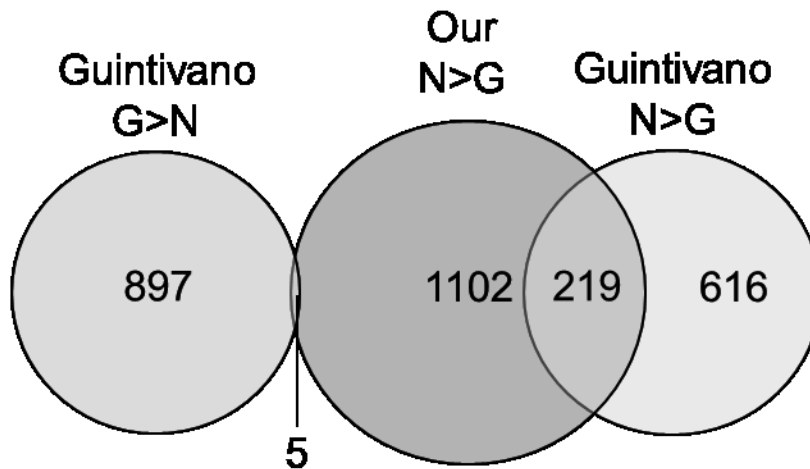

**Figure S7.** Comparison of genes identified as showing neuron vs. glia differences in methylation in human cortex by Guintivano et al. vs. in our analysis of the Lister & Mukamel et al human data. (A) Nearly 1/3 of the 902 genes identified as G>N in the data of Guintivano et al. were likewise classified in our analysis of the data of Lister & Mukamel et al. Only 3 genes identified by Guintivano et al. as N>G were classified oppositely by our analysis. (B) About 1/4 of the 835 genes identified as N>G in the data of Guintivano et al. were likewise classified in our analysis. Only 5 of the 902 genes identified by Guintivano et al. as G>N were classified oppositely by our analysis.

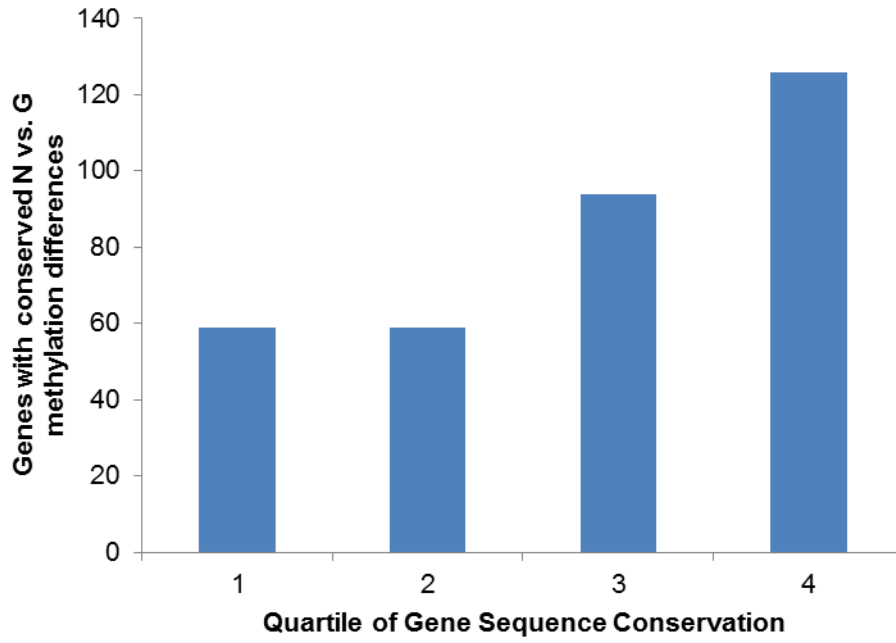

**Figure S8.** Conservation of gene-specific neuron vs. glia methylation differences between mouse and human cortex is associated with sequence-level conservation ( $P=5.0 \times 10^{-8}$ , chi-squared test).

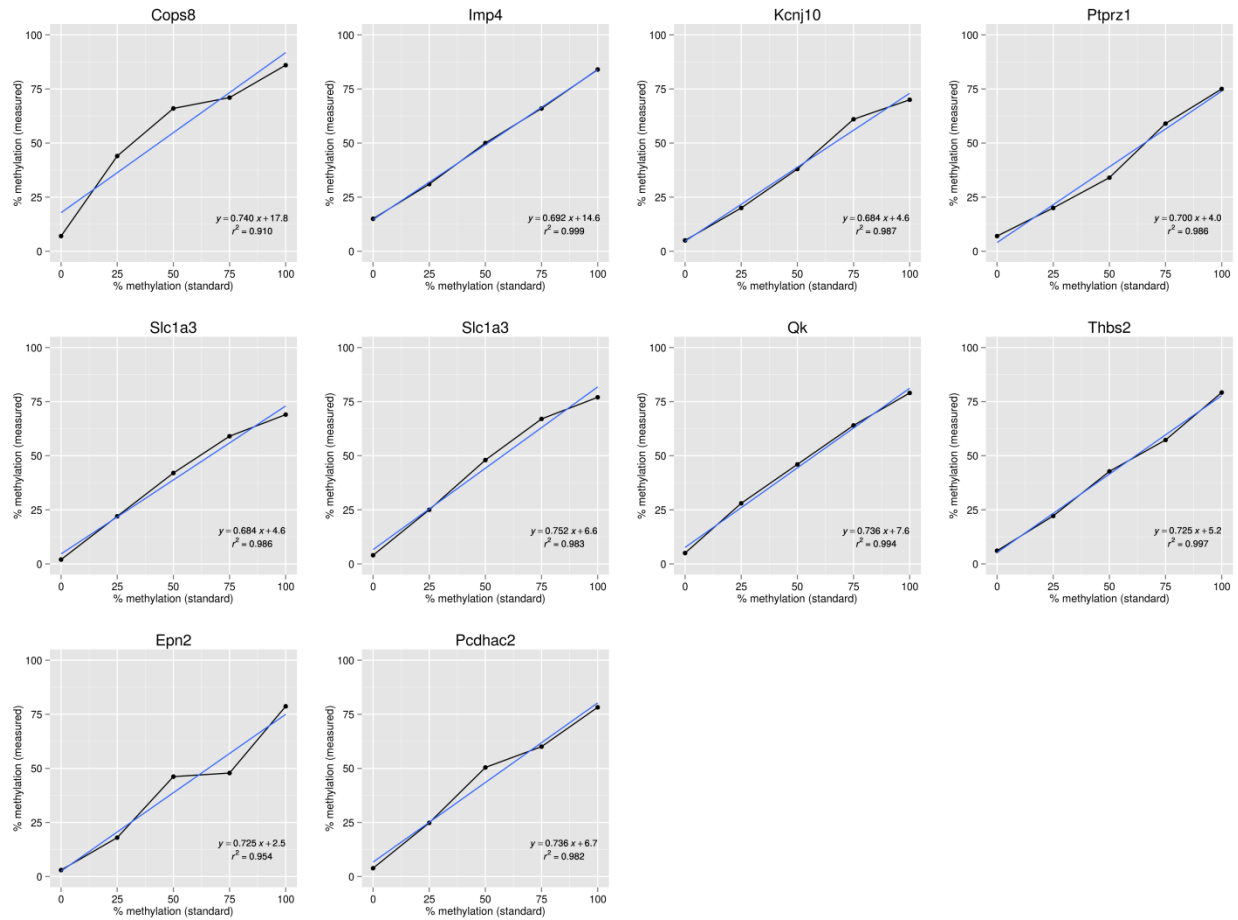

**Figure S9. Pyrosequencing standards for each assay used for validation confirm the accuracy of the assays.** For each of the nine genes in Figs. 3-4, standards were run on the corresponding pyrosequencing assays. The slopes, intercepts, and R<sup>2</sup> of each plot indicate that the bisulfite pyrosequencing results of these genes can be used with confidence. Note that there are two standards plots for *Slc1a3* as two separate assays were used for this gene.
